# Supplementary material for: Single Cell RNA Sequencing Reveals Deep Homology of Dental Cell Types Across Vertebrates
Source: Frontiers journal article supplement (doi:10.3389/fdmed.2022.845449), 2022-05-30
Supplement: Table_3.XLSX [file Table_3.XLSX]

## Sheet: MI
Endothelial	Maturing pulp	Glia	Lymphocytes	Distal pulp	Perivascular	Apical pulp	Lyve1 Macrophages	Macrophages	Pre-odontoblasts	SI + SR	Dental follicle 1	Dental follicle 2	OEE	Alveolar osteo.	Ameloblasts	Innate leukocytes
Podxl	Grik1	Sox10	Itgb7	Syt6	Ndufa4l2	Smoc2	Ccl8	Mir5107	Fgf3	Ascl5	Cyp1b1	Aldh1a2	Krt15	Kcnk12	Fam25c	1100001G20Rik
Ptprb	Ofcc1	Col28a1	Dpp4	Pik3c2g	Tusc5	Osr2	Folr2	Bcl2a1c	Sall1	Necab1	Adamts16	Pdzrn4	Fat2	F2rl2	Nccrp1	Pglyrp1
Eltd1	Hook1	Gfra3	Gm15987	Cntfr	Higd1b	Shisa2	Fcna	Bcl2a1a	Gsc	Igfbpl1	Lrrc55	Ltbp2	Th	Mdga2	Dsg3	Cxcr2
Tie1	Cntn6	Lgi4	Map4k1	Cd1d1	Rasl12	Avpr1a	Tslp	Zfp691	Adamts18	Wnt3a	Nptx1	Gdf10	Tenm2	Sptlc3	Dynap	Il1f9
Robo4	Sim2	Kcna2	Klrd1	Ctxn2	Olfr558	Dlx1	Lyve1	H2-Q1	Chst8	Pof1b	Col6a4	Hpse2	Gpx2	Miat	Slc5a8	Padi4
Mmrn2	Col9a1	Gpr37l1	Flt3	Pla2g4e	Ebf2	4930474M22Rik	Cd209f	Capn3	Tac1	Shh	Sbspon	Fam189a1	Dct	Aox1	Slc6a14	Trem1
Cdh5	Gm10789	L1cam	Cd244	Atp6v1c2	Adamts15	Lypd1	Cd209g	H2-Eb2	Dkk1	Vat1l	Sertm1	Grem1	Barx2	Plxdc1	Ngef	Il1r2
Ces2e	Unc80	Slc35f1	P2ry10	Adm	Casq2	Mansc4	Cryba4	Tlr9	Gm5148	Itgb6	Pla2g4c	Apol7e	Irx1	2020-03-11	Atg9b	Slpi
Ecscr	Rbm20	Nrn1	Dna2	Inmt	Kcnk3	Cacng5	Cd209b	Pira6	C1ql1	9530036O11Rik	Dusp10	Cldn2	Scnn1g	Dpp10	Rasgef1a	Mrgpra2b
Ushbp1	Pramef12	Gjc3	Btla	Acot1	Gpr20	Rabac1	Rnasel	Ch25h	Mc4r	Gdf6	Stmn4	Cldn11	Wnk4	Spp1	Clca5	Itgb2l
Myct1	Slc13a4	Kcna6	H2-Oa	D630033O11Rik	Serpini1	Slc2a7	Akr1a1	Gm8909	Ambn	Col22a1	Fam124a	Gm11149	Kl	Pou6f2	2200002D01Rik	Ankrd22
Gimap4	B3galt5	Foxd3	Fcho1	Sdsl	Rem1	Foxe3	Rnf150	Art2b	Fgf8	Aifm3	D430019H16Rik	Msc	Pvrl3	Bdkrb2	Psapl1	Slfn4
Ctla2a	3110009F21Rik	Zfp536	Skint3	Sphkap	Gm13889	Eif4a2	Phyhd1	Fam46c	D430041D05Rik	Foxi3	Cspg5	Fgf7	Clstn2	Tnfrsf13c	Slc26a4	Fpr2
Sox7	Gm13031	Scn7a	Gpr171	Gpr165	ORF63	Pafah1b3	Tlr5	H2-M2	Lingo3	Fam222a	Arhgdig	Sh3bgr	Rbbp8	Npas2	Krt6a	Chi3l1
Sox17	Hectd2	Pou3f1	Ptprcap	Lrrc4	Hrct1	Klkb1	Timd4	H2-Bl	Sgk3	Kcnf1	Cacna1d	Kcnj2	Gm20554	Fgf12	Wnt10b	AA467197
Meox1	H2afy3	Cdh19	Fcrla	2810011L19Rik	A830082K12Rik	Abhd14b	Guca1a	Cxcl10	Map6d1	Rhov	Cd27	Tnnt1	Cox7a1	Apol9a	Tmem63c	Cebpe
Abcb1a	Cux2	Erbb3	Bex6	BC039771	Cysltr2	Emilin3	Crybb1	Ppcdc	Acn9	Wfdc2	Sephs1	Bmper	Clic6	Dmp1	Slc15a1	9830107B12Rik
Nos3	Dhx35	Gm2115	Tnip3	Smim4	Agtr1a	Rorb	5031425F14Rik	Olfr111	Rcor2	Lrrc56	Adc	Cilp2	Cyp2s1	C130050O18Rik	D630023F18Rik	Ceacam10
C130074G19Rik	Gulo	Megf10	Card11	Calcb	Notch3	Cirbp	Rnf141	Batf3	Prmt3	Dsg1b	Tex40	Tnfsf11	Fam179a	Marveld1	Gm1045	Gm10872
Unc45b	Zcchc12	Ndst3	Ms4a8a	E330011O21Rik	Pdlim3	Foxd2	Zdhhc14	Mir1894	Hnrnpk	Plch2	Rai1	Comp	Fuom	Ssc5d	Anxa8	Dhrs9
Ccm2l	Kirrel3	Slitrk2	Fut7	Gpr37	Ephx3	Kcns3	D730005E14Rik	Mmp12	Gm13826	Fam19a4	Spin2	A2m	Ttc22	Gldc	Sel1l3	Retnlg
Grrp1	Lect1	Cadm4	Clec4g	Hibadh	Pla1a	Zfp575	Rnaset2b	Ccr3	Rad23b	Tdrd1	1190005I06Rik	C030030A07Rik	Ggt6	Sapcd1	Gm10637	Mmp8
Mir126	Lnx1	Csmd1	Tespa1	Trim9	Fhl5	Hpcal1	Dynlt1a	Ocstamp	Figf	Wipf3	Usp22	Tdrd9	Cox6a2	Hhipl1	Gm17660	Clec4d
Pecam1	Cage1	Egfl8	Spib	Oxtr	Mustn1	Slc10a4	Cd28	Serpine1	5930403L14Rik	Lemd1	Rhbdl1	Rbpjl	Kctd4	Fbxo31	Gsta3	Lcn2
Emcn	Nrk	Plp1	Ikzf3	Bmf	Rgs5	Srsf5	Mpi	Ifrd1	4933427D06Rik	Fam19a1	Basp1	Wisp2	Myh4	Acsf2	Fam151a	Tarm1
Plvap	Yipf1	Sox6	Ms4a4b	Rnf207	H2-M9	Rasgrf2	Il4	Nfkbib	Mir17hg	Bex4	Lactb	Edar	Ptp4a1	Sash1	Tmem45b	Gm16894
Cd34	Large	Cmtm5	BC051537	H1fx	Gm6249	Sstr4	Serpinb6a	Gla	Nme4	Cldn8	Wdr75	Col6a5	Cst6	Lynx1	Cdhr1	Nlrp12
Kdr	D630037F22Rik	Entpd2	Ccdc69	Cab39l	Slc38a11	Sec1	Il10	Fhad1	Nim1	Fgf16	Nacad	Fbxo32	Igfals	Dirc2	Foxo6	Tmem154
Gpihbp1	Spa17	Nkain4	Gpr18	A930013F10Rik	Syt5	Prrg1	F830016B08Rik	Kcnj9	Lyar	Vsig8	Nat10	Fgg	Krt76	Fam198a	Pcdh15	Mmp25
Sox18	Garem	Abca8a	Cd209c	Klf15	Des	Gpha2	Twf1	Maff	Cth	Klk11	Rsad1	Aspg	Lhfpl1	Anpep	Il11	Slc2a3
Gimap6	Efha2	Plxnb3	Zfp296	Sppl2a	Vstm4	Insrr	Bri3	Gpr114	Atic	Rnf32	Add1	Prmt8	Spink8	Jakmip2	Trex2	Csf3r
Gimap5	Luc7l2	Tmprss5	Cd7	9330182L06Rik	Ppp1r14a	Adcyap1r1	4930404N11Rik	Tgif1	Mir703	Atp6v1b1	Spsb1	Upk1b	Mill1	Dopey1	Vnn1	Aqp9
Ramp3	Pfkm	Rasgef1c	Arhgef37	Ccdc171	Adra2a	Khk	Wdr36	Gm15880	Dhfr	Cldn17	Jmjd4	Pde7b	Ncmap	Camkk1	Gjb2	Orm1
Ly6c1	Fggy	Efhd1	Klrb1b	Macrod2	Pde3a	Cbx7	Znf41-ps	4933433G15Rik	Eif2s3x	Gm10024	Gabrb1	Hmgcll1	Trpv1	Glrb	Ly6g6c	Gca
AU021092	Dnaja4	Kcna1	Tlr11	Chrd	Gpr81	Zbtb20	Ethe1	Gadd45b	D2Wsu81e	Megf11	Zfp449	Fdxr	Cluh	Tnrc6c	Agr2	Ppp1r42
She	Adcy9	Aspa	Cst7	Tmed1	Sema5b	Pnmal2	Kcnj16	Tm4sf5	Hnrpll	Gm4532	Tbl2	Popdc2	Akr1c18	Bend6	Clic3	B230208H11Rik
Gata2	Eno4	Pcdh20	Ffar4	Ccni	Nxph4	Thsd7b	4930486L24Rik	Adrb1	Emc8	Plch1	Slit2	Ccdc60	Sfrp5	D10Bwg1379e	Krt6b	Camp
Tmem88	Cpox	Cadm2	Cd209a	Pxk	Pde9a	Pfdn5	Incenp	Gm14023	Hnrnpu	Zfp711	Crtc1	Tnip1	Prkaa2	Bean1	Amtn	S100a9
Rasip1	Trim24	Esr1	Il12a	Srp14	Pygm	Esrrb	Gramd1b	Ddx5	Tango6	Otof	Sumf2	1700023F06Rik	Nrxn3	Dennd4c	BC021614	Ngp
Thsd1	Ip6k1	Dlgap1	Il7r	Gadd45g	Kcnmb1	Itm2c	Epn1	Sertad1	Wdr77	Ascl4	Chsy1	Inpp5j	Ucn2	Rab2a	Gjb6	Stfa2l1
Ppp1r16b	Map3k6	Mlph	Blk	Ppp1r9a	Hspb7	Plag1	2610507B11Rik	4931431C16Rik	Pgam1	Ccdc64b	Obfc1	Npas3	Baiap3	Galnt5	Sult2b1	Cldn15
Tnfsf10	Banp	Abca8b	Naaa	Pcyox1	5430416O09Rik	Dbx2	Entpd7	Zufsp	Npm3	2020-03-09	Prkrir	Kcnip2	Zfp385c	Gm9897	Gna14	S100a8
Aplnr	Lrrtm1	Adam23	Klrb1c	Aga	Susd2	2610034B18Rik	Usp21	Gbp5	4931417G12Rik	D930020B18Rik	Btbd2	Mia	Tdrd12	Clcn4-2	4930413F20Rik	Ccno
4930578C19Rik	8430410A17Rik	Plekha4	Prss16	G6pd2	Vtn	Amy1	Pisd	3010026O09Rik	Caprin1	Ccdc120	Armc9	Dpp6	Kcnc3	AI480653	Ano4	5430421N21Rik
Gpr116	Gpbp1	Gpm6b	Naip6	Kctd6	Fam81a	Efna3	Rap1gds1	Ugcg	Brca2	Plekha6	Gm13483	Actr3b	Grp	Masp1	Kcnmb2	Irg1
Pcdh17	Dnahc7b	Aatk	Grap2	Rnf122	Olfr78	Cntn1	Dusp7	A930006K02Rik	Gins2	Rpp25	Sec23ip	Gpr162	Prss33	Calhm2	Hs6st2	Arg2
Gimap8	Gm1673	Ajap1	Kynu	Cd247	Map7d2	Hp1bp3	Sbf2	Zswim4	Kdsr	Derl3	Fam126a	Pappa2	Cd164l2	Tex264	Krt16	Gm5483
Fam167b	Nars2	Ttyh1	S1pr5	Lgi3	1600015I10Rik	4933412E12Rik	Scp2	Rilpl2	Mpg	Krt73	A930004D18Rik	Adamtsl3	Esrra	Smim3	Flt3l	Foxd4
Mcf2l	Park2	Cyp2j9	Prtn3	Ube2h	Zfp804b	Qprt	Nrap	Ppt2	Mri1	Fam60a	Stk40	Pde11a	Scd3	NA	1700007K13Rik	Rdh12
Adamtsl2	Rpusd3	I730030J21Rik	Malt1	Tmem159	Gpr30	Tmx4	Dusp22	Zfp810	2410127L17Rik	Ppfia3	1700024P16Rik	Necab3	Pm20d2	NA	Sdcbp2	Lin28a
Arhgef15	Epb4.1	Shc4	Il1rl1	B9d2	Cabp1	Pnck	Snap29	D10Wsu52e	Xrcc6	Ttll11	Zc2hc1c	Gm10406	Ppargc1b	NA	Snai3	Ltf
Shank3	Thnsl2	Stard13	Lat	Clint1	4833422C13Rik	Hdac4	Adam3	8430419L09Rik	Otor	B4galnt3	BC018507	Megf8	Dlst	NA	Npbwr1	Mxd1
Egfl7	Mib1	Deptor	Ctsg	Rfk	Adcy6	Oxr1	Atmin	Ddit3	Rcbtb1	Mmp20	Wnt2b	BC049635	Iffo2	NA	Odam	Ifnlr1
Wscd1	Ppp1r36	Lgals2	Slc9a7	St8sia2	D630010B17Rik	Aaed1	Snx24	Atf4	Ints7	Kif7	Rabgap1l	Pcdhga11	Etnk2	NA	Tspan1	Mrgpra2a
Kank3	Casp6	Dagla	Dbnl	Cdkl3	Rbm24	Stil	Stard3nl	3230401D17Rik	Rtca	Cnksr2	Slc25a29	Panx2	A930012L18Rik	NA	Ptchd4	Mogat2
Notch4	Scn1a	Camk2b	Sla2	Slc25a27	Mrgprh	Socs1	Tbc1d14	Cnppd1	Mios	Amelx	Klhdc10	Arhgap20	Rnd2	NA	Bpifc	Abca13
Upp1	Spata6	Il1rap	Gm20324	Il17rc	Actg2	Aig1	Rapgef6	Ganc	Ppid	Cldn20	Rest	Lrfn3	P2ry2	NA	C530005A16Rik	Amer2
Rasgrp3	Trim45	Metrn	Fam96a	Erlec1	Mir145	Hif3a	Tgfbrap1	I830012O16Rik	Rpl5	Plk5	Nlgn1	Gal3st3	Ptplb	NA	Upk3bl	Mgam
Glt25d2	Mum1l1	Gas7	Ikbkb	Slc24a3	Ldb3	Heatr8	Atp6v0d1	Tank	Ccdc148	AI506816	Lrrc14	Atg16l2	Aldh1l1	NA	Krt27	Asprv1
Thrsp	Hddc3	Cnp	B3gnt5	Npr3	Kcnq4	Msrb2	Stab2	Tnfrsf14	Yif1b	Zfp7	Lrch2	Map3k12	Entpd5	NA	Pgm5	Retnlb
Cldn5	Garnl3	Gal3st1	Hist1h1d	Ankrd12	Plekhg2	Pttg1	Cgrrf1	Per1	Ddx59	Rhcg	Fam149b	BC003331	Ndufs2	NA	Slc4a9	Slco4c1
Esm1	Senp7	Luzp2	Tbl1xr1	Cdkn1b	Il12rb1	Prr24	Galk2	Gm2382	Ppie	Pabpc4	Lxn	Prob1	Kcnh2	NA	Csn3	9830166K06Rik
Cyyr1	Zfp341	Grik3	2610318N02Rik	Polr3d	Gm9199	Sntg2	Akirin1	Kpna4	Ado	Jakmip1	Ptpn23	Tab2	Gpnmb	NA	Slc22a4	Ear11
Gpr4	Arhgap21	Epb4.1l4b	Hnrnpf	Hbp1	Rtn4rl2	Cbfa2t2	Snx13	Gm216	Btbd1	Prss22	Tmem150a	Gnl2	Ogdh	NA	Tnni1	Dfna5
Zfp366	Tesk2	Nnmt	Stat5a	Lztr1	Pcolce2	Kcne1l	Cat	1700012B15Rik	Lrrc29	Mfsd2a	Aplf	Sult6b1	Dot1l	NA	1300002K09Rik	Spatc1
Erg	Gstm4	Sorcs1	5430437J10Rik	Pigu	Lrfn2	Ermn	Rilp	4833427F10Rik	Pgbd5	Rpl27	Kctd11	0610009L18Rik	Acadvl	NA	Cyp4f39	Ldhc
Bace2	Baiap2l1	Vstm2a	Nt5c	Rnf182	Adra1d	Dpf1	Hist3h2a	Armc2	Zmpste24	Ttc18	Cluap1	Pcdhgb6	Clpx	NA	4930455H04Rik	Mir142
Rgcc	Cep72	Cyp2j6	Xlr4a	Sgsm1	Mt3	Ndp	Enox2	BC005537	Ssb	Nphs1	Rnf11	1700112E06Rik	Herc3	NA	Casp14	Prdx5
Rbp7	Serhl	Hspa12a	Slc35c1	Clcf1	6330403A02Rik	Calml4	Lrp6	Isg15	Smarcd1	Best3	Mtmr11	Phf21a	Sv2a	NA	Gipc2	Dhrs7
Sema7a	Lrp1b	Tmem200c	Smpdl3a	Srprb	Gstp2	Psd2	Atp6v1f	Lnpep	Zc3h14	Enam	Csrnp3	Gclc	Ccng1	NA	H60c	Ptgs2
Flt1	Ift140	Fbxo7	Asf1b	1700012D14Rik	Rdh5	2210016L21Rik	Mtr	4930594C11Rik	Prpf40a	Dab1	L2hgdh	Pcdhga2	Cdk5r1	NA	Fam46b	Ms4a3
Gm16897	Acads	A330049N07Rik	Apba1	Cd1d2	Tbx18	Adh5	Nrbf2	Ppp1r10	Bbs7	Ptpn4	Osbp2	Hsf4	Aco1	NA	Pkp2	Sun2
Col13a1	Loh12cr1	Syt11	Ccnf	2010320M18Rik	Kcnab1	Dnajb2	Rab14	Extl3	Slc25a15	D3Bwg0562e	Ywhag	Slc35a2	Zhx2	NA	Gpa33	Elovl7
Klhl4	Otud7b	Igsf11	Prss30	Csrnp2	Hrk	Cry2	Clcn5	Spty2d1	Crebzf	Ybx2	Faxc	Rhbdl3	Ndufv3	NA	Ccdc170	2610037D02Rik
Exoc3l	BC052040	Tmod2	Fcrlb	Fam195b	Foxl1	2900056M20Rik	Sfi1	H2-T10	Rcl1	2810408I11Rik	Ythdf1	Ccdc64	2210416O15Rik	NA	Nrg1	Tuba8
Acer2	Pou2f1	Col20a1	Skap1	Lonrf3	Pde4c	Stk32b	Orai3	Coq10b	Metap2	Pfdn4	Trappc13	Bbs5	Dlat	NA	1600029D21Rik	2010002M12Rik
Vwf	Kctd7	Klhl30	Ppp4c	Gpr19	Htra4	Rdm1	Naa60	Gm6225	Cenpp	Gm5506	Mrpl15	Akap11	Kcnab3	NA	C1ql2	Chst13
Prkch	Smim8	Nkain2	Pot1b	Tmtc3	Il6	Gfpt2	Heatr5a	1110001A16Rik	Kat2a	Pgr	Grsf1	NA	Muc6	NA	Foxn1	G0s2
Kcnq1	L3mbtl3	Schip1	Rgag4	Rbm39	Npy1r	1700003E16Rik	Ctso	Zfp622	Fgd1	Spdl1	Plin3	NA	Atp2c1	NA	Unc79	Clec4b2
Als2cl	3830408C21Rik	Ccdc37	Mcmbp	Pwwp2b	Iqsec3	A030009H04Rik	Ankfy1	Rabep1	Ube2e2	Lcat	Nufip1	NA	Mtfp1	NA	Slc26a1	4933431G14Rik
Calcrl	Trip4	Tnik	Sdccag8	Dusp11	Rtn2	Snx21	Adcy3	Cyp4f13	3110021N24Rik	Mapre3	Pcdhb5	NA	Fbxw7	NA	Cryaa	Adpgk
Magix	Med23	Grik2	Nfil3	Thpo	Slc2a4	Sumo3	Stra13	Vcpip1	Tex10	Pno1	Kif3c	NA	Sod2	NA	Med27	Itprip
Nxpe2	2810021J22Rik	Ctnnal1	Ryr1	Map2k1	Tbx20	Gabarapl1	E430025E21Rik	Tmem87a	Spopl	Kif4	Tet2	NA	Tnrc18	NA	Hrasls	Grina
Heg1	Cul4a	Gpr17	Frat2	Tmbim4	Dcbld2	Gtl3	Fchsd2	Slc41a3	Uhrf1bp1l	Spcs2	Slc39a13	NA	Ccdc176	NA	Dynlrb2	R3hdm4
Nova2	C920006O11Rik	Kcnh8	Cep110	Rasl10b	Gpr133	Aldoc	Lgals8	Dnajc16	Tsen15	Gm13032	Gde1	NA	Ndst1	NA	Kcnk7	Slc6a12
Bik	Rassf8	Gm6634	C920009B18Rik	Kif13b	Dgkb	Use1	Atxn3	Ap5z1	Xrcc2	Med19	Tspyl3	NA	B430212C06Rik	NA	9030404E10Rik	Tmcc1
Myzap	Zfp606	Stk32a	Hist1h2ab	Zc3h6	Ccdc160	Per2	Mthfs	Zfp456	Ddx18	Ell3	Bet1l	NA	Acad11	NA	6720468P15Rik	Gm19705
Bmp15	Ninl	Adam11	3110002H16Rik	Slc30a4	Fabp4	Ppp2r1a	4931406C07Rik	Brd2	Saal1	Sapcd2	Entpd6	NA	Slc11a2	NA	Pex11c	Capn1
Bcl6b	Ccbl2	Gm10863	Bak1	Ppp4r4	5730508B09Rik	Cd82	Idh2	Klc4	Mrpl2	Paip1	Pcdhb6	NA	Ncrna00085	NA	Rundc3a	Svil
Jam2	Glrx2	Gpt2	Rab8a	Spr	Chsy3	Acbd4	Dmxl1	Gtf2h2	Gm14326	Disp1	Arnt	NA	Mia3	NA	D930028M14Rik	Ppp1r3d
Ccdc85a	Prkdc	Snca	Frg1	AI316807	Sgca	Fbxl21	Atg5	Kdm2b	Smc1a	Pi4k2b	Zfp866	NA	Eva1c	NA	Ephx4	Dedd2
Pkn3	Ei24	Lrrc4c	Ankrd13a	Cul1	Myocd	Sdha	0610012G03Rik	Hps5	Wwp2	Coro6	Kctd18	NA	Arhgap5	NA	Rnf39	Abtb1
Tfpi2	Sclt1	Dnaic2	Nr4a3	Wdr45	Sctr	Tef	Snx11	Mx2	Hdgfrp2	Fbf1	Slc25a24	NA	Son	NA	Ctrc	1700055N04Rik
Akr1c14	Lrrc16b	Serpina3n	Uggt1	Pigyl	Plcl1	Ergic3	Prorsd1	Inpp5k	Ak4	Syne4	Usb1	NA	Cox14	NA	Tgm3	Scnn1a
Endou	Evi5l	Bcas1	Dcaf15	Acap2	Olfr1033	Anxa7	Plbd2	Eif2ak1	Tyw3	Tox3	Glg1	NA	Kifc2	NA	Atp6v1g1	Map3k15
Clec1a	Akr1e1	Prkcq	Psme2	Grhl1	Adra1a	Slc25a12	Pml	Nmd3	Unk	Sptb	Dad1	NA	Slmap	NA	Glt28d2	Gfod1
Tbxa2r	Strn3	Serpind1	Aldh1b1	Mbd4	Arhgap44	Fam169a	Ralgds	NA	Qtrtd1	Fau	Mogs	NA	Phyh	NA	Acadl	Egln3
Cda	Klhl12	Pex5l	Rbks	Mapk8ip1	Agt	Ldb1	Ipmk	NA	Arl5b	2700097O09Rik	Rbm43	NA	Rxra	NA	Slc18a1	Tex15
Ssu2	Ublcp1	Igsf21	Dclre1b	Dmrtc1a	Gpr21	B930041F14Rik	2310040G24Rik	NA	Copz1	Cecr6	Steap1	NA	Gm3414	NA	Clgn	Sycp2
Tmem255b	Pabpc4l	Brsk2	Kdm3b	Ankrd11	Ctnna3	Acaa1a	Fam118b	NA	Elavl1	4930427A07Rik	Prr3	NA	Usp32	NA	Slc6a4	Depdc1b

## Sheet: MIM
Pulp cells	PDL	Macrophages	Pericytes	Endothelial cells	Glia	Epithelial cells
OLFML1	BMP3	LYZ2	RGS5	FLT1	MPZ	KRT14
RSPO4	LRRC15	CD74	CASQ2	PLVAP	SCN7A	KRT5
VCAN	COL1A2	CTSS	STEAP4	LY6C1	PLP1	CALB1
SCUBE1	NTS	C1QB	MYH11	CD34	KCNA1	KRT17
DIO3	COL3A1	H2-AA	NDUFA4L2	EMCN	MAL	LAMC2
RDH10	EPHA3	C1QC	AOC3	PTPRB	KCNA2	CKMT1
SOX9	DKK2	H2-EB1	NOTCH3	KDR	SOX10	PITX2
CRABP1	DPEP1	CSF1R	H2-M9	ESM1	NCMAP	DSP
UNC5C	IGF1	C1QA	ASPN	PODXL	COL28A1	COL17A1
PTN	BCL11B	RGS1	HIGD1B	PECAM1	LGI4	EPCAM
CYBRD1	COL26A1	TYROBP	OLFR558	CDH5	GJC3	DSC3
DLX3	LAMC3	FCRLS	MUSTN1	CLDN5	EGFL8	LAMB3
TWIST2	SVEP1	H2-AB1	SERPINI1	EGFL7	CLDN19	TRP63
ISLR	MMP23	IL1B	RASL12	CYYR1	PRX	CYP26A1
COLEC12	LSP1	FCGR3	RGS7BP	MMRN2	MBP	SPINT2
COL9A2	LRRC17	CCL4	TUSC5	C130074G19RIK	CDH19	VWA2
DCLK1	NPTX1	MRC1	MRVI1	LY6A	GFRA3	ISL1
VIT	P4HA3	CX3CR1	ADAMTS15	TIE1	PLEKHA4	PERP
IGF2	TNN	MS4A7	RGS4	ROBO4	ABCA8A	DSC2
MATN4	WNT11	CCL3	EBF2	APLNR	CNP	PKP1
CPXM1	CPZ	CYBB	LMOD1	VWF	CADM4	PROM2
FBLN1	EFCC1	FCER1G	PCDH19	CTLA2A	HCN1	TRIM29
TBC1D4	TIMP2	PTPRC	PDE3A	RASIP1	S100B	SERPINB5
FGFR1	ADAMTS16	MPEG1	CYSLTR2	SOX17	GPR37L1	DSG2
IL11RA1	SPOCK1	HPGD	NR2F1	USHBP1	L1CAM	D630045J12RIK
DLX4	SRPX2	PF4	SLC38A11	MYCT1	HSPA12A	4833423E24RIK
OSR2	NDNF	CD53	EYA4	SLC9A3R2	PLLP	TBX1
TLE2	CYP1B1	WFDC17	PDLIM3	FAM167B	GPM6B	ESRP1
NSG1	RBFOX1	APOE	CCDC3	SEMA7A	DUSP15	WNT7A
TGFBI	PTGFR	LAPTM5	FOXS1	SOX18	POU3F1	CDH3
GHR	OPCML	C3AR1	VSTM4	MCF2L	RELN	PLEK2
NTRK3	APCDD1	CCL6	REM1	CLEC14A	ERBB3	SFN
DLX5	XIST	CXCL2	LIN7A	CES2E	PLEKHB1	SPINT1
IFITM1	COL6A4	LY86	ABCC9	PCDH17	KCNA6	FERMT1
ALX3	HMGA2	CLEC4N	EPHX3	ENG	CTNNAL1	CELSR1
FBN2	HTRA3	CCL12	PRKG1	COL13A1	AATK	WNT4
SHISA2	SFRP4	FCGR2B	FABP4	EDN1	SHC4	LSR
OAF	SYTL2	CD52	KCNK3	GIMAP6	PTPRZ1	PKP3
DLK1	WNT5B	CLEC4A3	ARHGAP6	GPIHBP1	FOXD3	SLC9B2
FMOD	ROBO2	PLD4	HRCT1	ABCB1A	NRN1	IL17RE
COL23A1	PODNL1	MS4A6C	HEY2	RSAD2	SORCS1	PRDM6
FRZB	IBSP	AIF1	JPH2	THRSP	ABCA8B	ST14
ANGPT4	RPLP1	F13A1	RASL11A	PLSCR2	MEGF10	ZFP185
MEGF6	ABCG5	GPR65	TRPC6	GRRP1	UGT8A	LAD1
DCN	NRTN	MS4A6B	ACTA2	BTNL9	SLC35F1	LYPD6B
STC2	RSPO1	CD14	CYGB	CLEC1A	DEPTOR	RIPK4
HMGN3	ISM1	CCL2	MYLK	CLIC5	CADM2	AP1M2
COL8A2	EYA2	CD83	CCDC141	RAMP3	KIF1A	STARD10
GM973	VSNL1	CD68	GPR20	ARHGEF15	FA2H	TRP73
WFIKKN2	GPR27	HPGDS	SHOX2	TEK	FAM178B	NKX2-3
CHKA	NTN1	CTSC	NGF	MECOM	ZFP536	CDCP1
FREM1	RAB30	CLEC4A2	BARX1	RAMP2	CSMD1	RAB25
SFRP2	LOX	CD86	DES	ICAM2	BCAS1	LGI2
NQO1	SEC24D	FCGR1	RTN4RL1	KANK3	DHH	BNC1
EFNB3	PDIA5	CLEC4A1	CAP2	SLCO2A1	PLXNB3	KRTCAP3
BMP2	LARP6	LAIR1	PIP5K1B	RASGRP3	TTYH1	S100A14
FGFR3	PYCR1	CCR1	PLA1A	GALNT15	TMOD2	GRHL2
EMILIN2	CTTNBP2	RAC2	NOV	NOTCH4	CMTM5	TMEM184A
GRIA3	VASH2	PLEK	RBPMS2	GIMAP4	MLIP	PITX1
IRS1	RPS9	FYB	DGKB	TNFSF10	IGSF11	PRSS8
SCARA3	EEF1A1	CXCL16	ITGA10	JAM2	GAL3ST1	SYTL1
DLX1	RPL23A	LST1	KCNE4	PDGFB	SOX6	LY6H
PPFIBP2	ATP5E	GPR34	PPP1R14A	CCM2L	VGLL3	TMEM54
KCTD12	AXIN2	NCKAP1L	FOXC2	RBP7	GM2115	DAPL1
SMOC2	1700066M21RIK	CORO1A	MAP7D2	DYSF	DLGAP1	EVPL
NDN	CACNA2D3	SLA	STC1	TMEM88	NDST3	GRB7
OLFML3	WDR89	CLEC12A	RAPH1	CALCRL	FRMD3	PAK6
LHX8	CTSL	C5AR1	MARK1	HEG1	RASGEF1C	CYP26C1
TCEAL3	TASP1	CD300A	PDE1A	BCL6B	TMPRSS5	PPP1R13L
MPZL1	DCAF12L1	MGL2	FAM81A	PDE2A	SLITRK2	NTF5
PTGES	CACNA1D	MS4A6D	1600015I10RIK	SOX7	ADAM23	CRB3
SNAI1	PPP1R14B	ITGAM	ADCY6	UNC45B	CYP2J9	OCLN
CACNA1H	LRRC49	IL10RA	XIRP1	GIMAP8	GAS2L3	CD44
ADAMTS3	PSD	ITGB2	MYOM1	NOS3	TNIK	PPL
NELL1	SGMS2	SLC11A1	GDF11	SHE	NKAIN2	FRAS1
TGFB3	RPL12	HCLS1	KCNJ8	CCDC85A	ASPA	ASCL5
CDH2	RSAD1	CD72	TRPC3	LRG1	9530059O14RIK	FAM83G
ENPP2	RPL8	IGSF6	AKAP6	GBP4	SEC14L5	HR
WDR86	LEFTY1	CD33	OLFR78	PLK2	NKAIN4	SLC39A8
CLMP	RPLP0	CYTH4	A830082K12RIK	ABCG2	ARHGEF26	WNT3A
6330403K07RIK	ARF5	PLBD1	PLCL1	MEOX1	MFAP3L	TESC
COCH	SGSM2	TNF	CFH	GIMAP1	CYP2J6	CASZ1
ZFHX4	RPS18	MSR1	RBM24	THSD1	MAG	ELMOD1
PDGFRL	FAM109B	P2RY6	GUCY1A2	PRKCH	ENTPD2	CNKSR1
LYPD1	RPL14	CD84	DGKG	PPP1R16B	PMP22	MREG
CRISPLD1	SLC35E3	H2-DMA	C1QTNF7	HECW2	MLPH	SCNN1B
PDZRN3	RPS12	CLEC10A	IL6	AKR1C14	GRIK3	DSG1A
CAPN6	ATRNL1	CFP	SYT5	ADAMTSL2	GLDN	SHH
PAM	PLXDC1	SIGLEC1	SYNPO2	GIMAP5	AJAP1	FAM83H
1810041L15RIK	RPL37	FCGR4	MYOCD	DLL4	PCDH20	LGALS12
LRRC42	RPL21	CTSH	TRPC1	FMO2	SLC36A2	POF1B
ENPP6	ATP5K	LILRA5	HSPB7	SHANK3	DRP2	MARVELD3
PPP1R3C	RPS17	CD48	KCNQ4	PCP4L1	CARNS1	CLDN1
DYNC1I1	RPL35	LCP1	WTIP	CLEC2D	STARD13	CHCHD10
TMEM98	CHSY1	PTPN6	GNAO1	CARD10	RXRG	IGFBP2
SCRN1	COX6C	POU2F2	ZBTB7C	MFNG	PEX5L	KLF5
FHL1	RPL17	NEURL3	NR4A3	LMCD1	LRRTM4	CHMP4C
FGF10	RPS10	LCP2	SERPINE1	PTPRG	1700047M11RIK	HSPB8
GPX3	NA	CD4	LDB3	ALS2CL	GFRA1	LGALS7
CLIP3	NA	CD36	KCNT2	ELK3	SLC9A3	WNT7B

## Sheet: HM
Pulp cells	Perivascular cells	Endothelial cells	Glial cells	Odontoblasts	Immune cells	PDL
TF	ACTA2	VWF	MPZ	ST8SIA1	CCL4	MMP13
PTN	TAGLN	FLT1	S100B	SPOCK3	CCL3	SFRP4
DLX6-AS1	NDUFA4L2	PODXL	PLP1	PHEX	IL1B	LRRC15
CRABP1	RGS5	SOX18	CDH19	MMP20	C1QA	COL11A1
CCK	RRAD	CD34	MBP	SEMA3E	CCL4L2	TENM4
NSG1	MYH11	PLVAP	ALDH1A1	DMP1	CXCL8	THSD4
DGKI	SOD3	KDR	PMP2	WISP1	C1QB	PLAGL1
FAT3	RGS16	AQP1	CRYAB	AOC2	MS4A7	GREM2
HAPLN1	STEAP4	EMCN	MAL	TRPM7	TYROBP	RAB27B
PTPRD	RERGL	CLDN5	GATM	CYFIP2	DUSP2	DPEP1
SYT1	CCDC102B	TM4SF18	COL28A1	SLC12A2	CCL5	PTH1R
FBN2	COX4I2	ADGRL4	CAPS	SYT12	PTPRC	FNDC1
SOX9	KRT18	CLEC14A	MYOT	AMBN	C1QC	SRPX
TIAM1	EDNRA	PECAM1	GJC3	WDR72	NKG7	SVEP1
FAM69C	RCAN2	DNASE1L3	AZGP1	AJAP1	LYZ	PDGFRL
COL26A1	ABCC9	PTPRB	ERBB3	UCK2	TNF	PRSS35
COL8A2	CASQ2	TM4SF1	GFRA3	KCNK10	CXCR4	SGMS2
KIT	EFHD1	EGFL7	MT3	MAPT	AIF1	C5AR2
HTRA3	NOTCH3	CALCRL	GAS2L3	DTNBP1	CD83	BMP5
MFAP2	LMOD1	CDH5	XKR4	DIAPH3	CD14	P4HA3
PCOLCE2	MRVI1	ROBO4	TRPM3	NPTX2	FCER1G	FGFR2
SCRG1	CARMN	RAMP2	BCAS1	HYAL4	MS4A6A	MRGPRF
MSX2	INPP4B	MMRN2	NCMAP	WNT10A	FOLR2	ALPL
SFRP1	FRZB	CD93	SOX10	SLC2A13	TNFAIP3	MMP23B
CD24	MCAM	ACKR1	PMP22	KCNJ2	MRC1	ADAM12
CTHRC1	PARM1	SELE	PRRG4	PCDH7	HCST	ABI3BP
TNN	KCNJ8	THBD	POU3F1	SCG2	RGS1	ADAMTS2
DIO3OS	GJC1	BTNL9	PRX	GRIK1	CXCL3	TGFB3
DAPL1	PHLDA2	RAMP3	HSPA12A	UNC80	CD163	RBP4
LSAMP	FILIP1L	FMO2	ITGB8	TXLNB	LYVE1	EYA1
ROBO1	KCNE4	CYYR1	FOXD3	ATP8A2	CD69	MMP11
BHLHE41	NR2F2	ECSCR	TMEM176B	KAZALD1	GZMA	VDR
CRISPLD1	GPRC5C	PALMD	AATK	COL24A1	CSF1R	GAS1
TWIST2	ADAMTS4	SLCO2A1	MLIP	MANSC4	GPR183	NDNF
RSPO2	PLN	NOSTRIN	PLEKHA4	CNKSR2	LCP1	FRAS1
CNTN3	KIAA0040	GIMAP8	CHL1	GABRB1	PLEK	PRSS12
GJA1	PGF	KANK3	CLDN19	WDR62	ITGB2	EGFR
TMEM150C	MYOCD	TMEM88	PLLP	UBE2QL1	CD48	TRAM2
SPON1	KLHL23	MYCT1	NTM	COL11A2	BCL2A1	THBS4
DLX4	SGIP1	TNFSF10	TMEM176A	KCNA4	MS4A4A	RNF144A
RARRES1	RASL11A	ABCG2	KIF19	HOMER2	F13A1	PTGFR
SLC4A4	ARHGAP6	EHD4	SHC4	SLC39A14	CORO1A	PODNL1
ABCA6	GEM	TIE1	ART3	PLCD4	IL7R	CERCAM
LRRTM3	FHL5	PDE2A	KCNK12	EPHA5	MPEG1	MT-ND3
CRABP2	CYGB	GPIHBP1	FSTL3	FEZ2	KLRB1	SULF1
KIF26B	KRT8	FZD4	SFRP5	SH2D4A	IL10RA	FZD8
CALN1	RERG	SOX17	KANK4	ZDHHC2	CYBB	GALNT5
COL21A1	KCNAB1	GIMAP6	DRP2	LRRK2	CST7	ENC1
COL25A1	NR2F2-AS1	MYO5C	SOX2	PADI2	CD68	FBXL7
NEDD4L	RNF152	ERG	FOXD3-AS1	GALNT6	NLRP3	RCN1
IL1R1	CSRP2	LMO2	UGT8	MALAT1	LAPTM5	MEGF10
CDH12	TPPP3	ENG	KIF1A	APOD	CD2	LOX
SDC1	EBF2	ESM1	SOX8	KCNN4	CD37	WDR27
MYO16	LINGO1	ARHGEF15	CADM3	KIDINS220	PLAUR	STON2
AFF2	RASD1	ITM2A	NKAIN3	AFAP1	CD53	LEF1
GPC6	TEX41	SHANK3	CMTM5	SLC45A3	CD3D	COL8A1
MEST	REM1	DLL4	ASPA	MCOLN3	SIGLEC1	KIF16B
CFH	MYOM1	PCAT19	L1CAM	RNFT1	CTSS	ANOS1
DLX5	LINC01197	ADAM15	PRIMA1	LRRC49	LST1	PYGO1
OLFML3	MYC	LDB2	ADAM23	SLC24A4	GZMK	TIAM2
BARX1	MYLK	ABCB1	ANGPTL7	NINJ2	CD84	DNM1
EFEMP1	AGT	SLC9A3R2	MATN2	LRRC8E	SAMSN1	FNDC3B
RAMP1	SLC7A2	NOTCH4	SEMA3B	BCAS4	CD3G	CPQ
TCEAL2	FOXS1	NFIB	PCSK2	CHMP4C	LTB	SIDT2
PTX3	ITGA7	MECOM	CADM4	SIK2	IKZF1	EPDR1
OLFML1	SLCO1C1	RASIP1	GPM6B	NPM2	TRBC2	PTGFRN
CLDN11	HRC	SPARCL1	TFAP2A	NPW	CCL8	FGFR3
DLX6	SYTL2	CDA	LGI1	IRX3	SLA	NA
DLX1	TRPC6	TEK	SORBS1	KLF5	FCGR2A	NA
NOTCH2	GUCY1A2	FAM107A	TUBB2B	PDPN	GPR34	NA
PYGL	PDE8B	COL15A1	CNP	SP6	GZMH	NA
GHR	LURAP1L	JAG2	TSC22D4	XPO5	CD3E	NA
GXYLT2	ADIRF	RUNDC3B	FIGN	GRAMD1B	TAGAP	NA
RNF150	PDE3A	APLNR	TIMP4	KCNMA1	NCKAP1L	NA
NEBL	RASL12	ADCY4	NGFR	SYT17	CTSW	NA
LHX8	MYO1B	IL33	TMPRSS5	ARHGAP5	VAMP8	NA
SEZ6L2	SYNPO2	TNXB	CADM2	BAG2	C5AR1	NA
MDK	CSPG4	GRB10	PLEKHB1	PERP	ALOX5AP	NA
PDGFD	TTLL7	ADGRG1	GPR37L1	PIEZO2	FGL2	NA
GLT8D2	KCNB1	FAM167B	SBSPON	ZNF385B	JAML	NA
MEG3	RASGRP2	MCTP1	PHLDA3	KANK1	TRAC	NA
AGPAT4	WTIP	LIFR	HCN1	BAIAP3	PRF1	NA
PKDCC	EPS8	BCL6B	C1QL1	NDFIP1	VSIG4	NA
SLC20A2	PRKG1	NPDC1	MAG	FAM78B	ADAP2	NA
ALDH1A3	DSTN	GNG11	ZNF536	RANBP3L	RAC2	NA
MME	MOCS1	INSR	FST	ITPRIPL2	FCER1A	NA
RARRES2	ARHGEF17	NUAK1	KHDRBS3	MYO6	NR4A3	NA
TGFBI	SSTR2	GALNT15	MEGF9	CCDC184	NFKBID	NA
PHIP	PAWR	ETS2	PAQR6	TTC9	CLEC7A	NA
CNTN4	NEXN	MYRIP	GAL3ST1	POMT2	GZMM	NA
MXRA5	TGFB1I1	RAPGEF3	PEX5L	KIF7	MSR1	NA
FAM13A	JAG1	FGD5	SMIM5	LRRN1	LILRB5	NA
HMGN3	PDE1A	ELK3	APOA1	SDK2	TRBC1	NA
RRBP1	UBE2E2	KCNN3	TSPAN15	ZSCAN18	CYTH4	NA
IGFBP6	FAM162B	HYAL2	ARHGAP19	JAM3	FCGR3A	NA
IGFBP3	CBLN2	CCL14	CDH7	RNF157	CYTIP	NA
PDCD4	EBF1	GALNT18	GFRA2	TMED8	DOK2	NA
LAPTM4A	ADCY3	FLT4	KRT14	TMX4	EVI2B	NA
TTC3	UBA2	RBP7	IGSF1	RAB23	LCP2	NA
RPL41	MICU3	PCDH17	ADGRB3	CD276	NCF1	NA
